# Supplementary material
Source: Copernicus journal article supplement (doi:10.5194/egusphere-2026-534)
Supplement: Supplementary file 1 [file egusphere-2026-534-supplement.pdf]

1 *Supplement of*

2

3 **Ocean Model Analysis and Prediction System version 4.1i (OceanMAPSv4p1i)**

4

5 Divakaran et al.

6

7 *Correspondence to:* Prasanth Divakaran ([prasanth.divakaran@bom.gov.au](mailto:prasanth.divakaran@bom.gov.au))

8

9

10

11

12

13

14

15

16

17

18

19

20

21

22

23

24

25

26

27

28

29

30

31

32

33

34

35

36

37

38

39

40  
41

## 42 **1 Eddy verification**

43

44 The section presents information on eddy-tracking verification of 24-hr forecasts from OceanMAPSv4p1i and  
45 OceanMAPSv4p0i, in accordance with the methods and region specified in the Smith and Fortin (2022) [hereafter  
46 SF 2022]. As in SF 2022, we use the py-eddy-tracker (Mason et al., 2014) to identify and track eddies. Py-eddy-  
47 tracker is freely available open-source Python software under the GNU license ([https://github.com/AntSimi/py-](https://github.com/AntSimi/py-eddy-tracker)  
48 [eddy-tracker](https://github.com/AntSimi/py-eddy-tracker)). This approach is also adopted in version 3 of the AVISO Eddy Atlas (AVISO, 2016). The AVISO  
49 Ssalto/Duacs altimeter analysis dataset used in the study is the latest high-resolution ( $0.125^\circ$ ) gridded Level 4  
50 product produced and distributed by Copernicus Marine and Environment Monitoring Service (CMEMS)  
51 (<https://doi.org/10.48670/moi-00148>). The main difference in eddy identification criteria between SF 2022 and  
52 the current study is in the number of minimum grids, which has increased from 5 to 20 to align with the higher  
53 resolution in the datasets. The verification domain covers the Gulf Stream region in the northwest Atlantic, for  
54 the period 20 August 2023 to 31 January 2024.

55

56 The identification of anticyclonic and cyclonic eddies from two consecutive days (26 August 2023 and 27 August  
57 2023) is shown in Fig. S1 and Fig. S2 for AVISO, OceanMAPSv4p0i, OceanMAPSv4p1i and OceanMAPSv4p1i  
58 run001 products. Qualitatively, there is a high correspondence between eddy contours and filtered SSH as evident  
59 in the observational analysis and in all three OceanMAPS forecasts. However, visually, the number of eddies  
60 detected in the forecasts is fewer than in the observational analysis. Generally, average forecasts have eddy  
61 numbers that are lower than those of individual members, as ensemble averaging smooths out random errors that  
62 increase with the wavenumber. However, we note that OceanMAPSv4p0i forecasts fail to adequately represent  
63 the majority of smaller eddies north of  $50^\circ$  N in the study domain. The persistence of eddies and mesoscale features  
64 can be done by comparing daily snapshots from consecutive days (Fig. S1 and Fig. S2). Mesoscale features in the  
65 observational analysis and forecast products from OceanMAPSv4p1i look consistent and show minimal  
66 differences between 26<sup>th</sup> August and 27<sup>th</sup> August. However, OceanMAPSv4p0i forecast differs greatly between  
67 Fig. S1 and Fig. S2. For example, the anti-cyclonic eddy located at  $60^\circ$  W,  $37.5^\circ$  N, surrounded by a ring of  
68 smaller cyclonic eddies, is a prominent feature in all products. This feature has shown greater persistence in  
69 AVISO observational analyses and in OceanMAPSv4p1i forecasts; however, it appears to vary substantially  
70 across consecutive forecasts from OceanMAPSv4p0i. As noted in the paper, this is due to an inconsistency in the  
71 forecast system layout in OceanMAPSv4p0i, which has been rectified in OceanMAPSv4p1i.

72

73 Eddies in forecasts generally exhibit qualitatively similar properties in terms of radius and amplitude to those  
74 observed in AVISO analyses (Fig. S3). However, the total number of detected eddies in the forecasts over the  
75 study period, relative to the number in the observed product, is  $\sim 68\%$  and  $\sim 65\%$  in the average forecasts from  
76 OceanMAPSv4p1i and OceanMAPSv4p0i, respectively. The single-member forecasts from OceanMAPSv4p1i  
77 produced nearly 80 % of the total observed eddy population. Though the total number of eddies in the average

78 forecasts from OceanMAPSv4p0i and OceanMAPSv4p1i are more or less similar, OceanMAPSv4p1i forecasts  
79 have improved representation of smaller eddies with radii close to 20 km adequately. As noted in the system  
80 description, OceanMAPSv4p0i average forecasts are initialised with the average of ensemble restart files at the  
81 end of the hindcast run. The inherent randomness of individual members increases over the three days of the  
82 hindcast run, and averaging restarts at the end of the hindcasts cancels out many small-scale features. To address  
83 the forecast initialisation issue noted in OceanMAPSv4p0i and to account for the importance of randomness in  
84 generating spread in an EnKF system, we introduced a near-real-time (NRT) analysis in OceanMAPSv4p1i  
85 forecast system. This intermediate step leverages the 2-day observation latency relative to real time, and works  
86 without affecting the spread of individual members. The average NRT analysis (best estimates) is used as  
87 initialisation for the forecast forward run to represent the mesoscale ocean state better in OceanMAPSv4p1i  
88 forecasts.

89

90 Matching of eddies in the observation and forecasts are done using the cost function (C) minimisation described  
91 in equation 1 in SF 2022. Here, C is a function of the difference in amplitude (A), radius (R) and distance (D)  
92 between eddy centres, and is used to identify the most likely match as shown below in the equation, where the  
93 subscripts 1 and 2 refer to the two eddies being considered. In our study, subscript 1 denotes the eddy from  
94 observation, and 2 indicates the eddy from forecasts matched against 1.

95

$$96 \quad C = \sqrt{\left(\frac{A1-A2}{A1}\right)^2 + \left(\frac{R1-R2}{R1}\right)^2 + \left(\frac{D}{125km}\right)^2} \quad (1)$$

97

98 Following SF 2022, we examine the fraction of observed eddies captured by ocean forecasts using the probability  
99 of detection (POD). The fraction of predicted eddies in the forecast that did not have a match in the observation,  
100 using the False Alarm Ratio (FAR). The domain-average time series of POD and FAR are shown in Fig. S4. Both  
101 statistics vary daily, with minimal seasonal variation. The individual member forecast from OceanMAPSv4p1i  
102 has the highest POD (~0.6), with the run004 average forecasts from v4p1i (~0.55) and v4p0i (~0.53) ranking  
103 second and last, respectively. This indicates that run004 forecasts from OceanMAPSv4p1i exhibit a 5.4% higher  
104 POD than those from OceanMAPSv4p0i. FAR is greater for individual member forecasts from  
105 OceanMAPSv4p1i, with values close to 0.23. This may be due to chance/randomness in the large number of  
106 predicted eddies in the run001 forecasts, which in turn yields higher POD and FAR values. The false-alarm rate  
107 in the OceanMAPSv4p1i run004 forecast (~0.178) is the lowest among the three, with the OceanMAPSv4p0i  
108 run004 forecast (~0.188) coming in the middle. That means a difference of -5.5 % on FAR for OceanMAPSv4p1i  
109 over OceanMAPSv4p0i in the average forecast product.

110

111

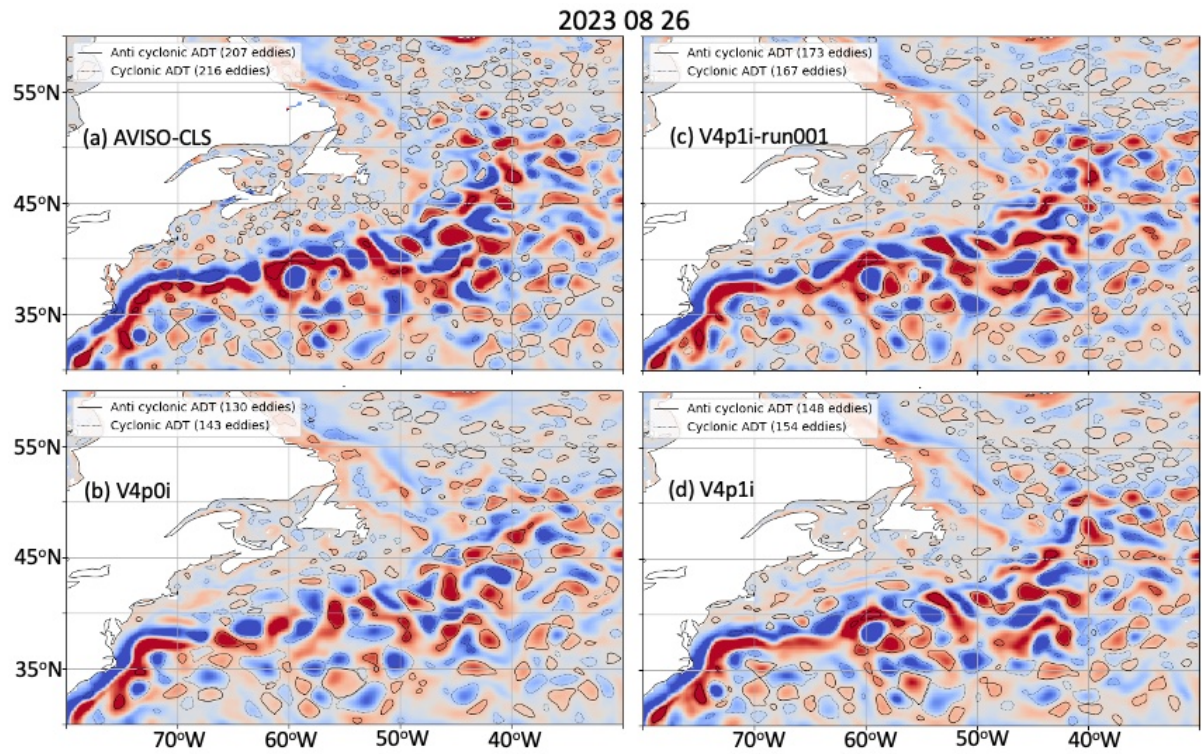

112  
 113 **Figure S 1: Filtered SSH field valid for 26 August 2023 for (a) AVISO gridded satellite observations, 24-hour forecast**  
 114 **fields from (b) v4p0i, (c) v4p1i-run001 and (d) v4p1i.**

115

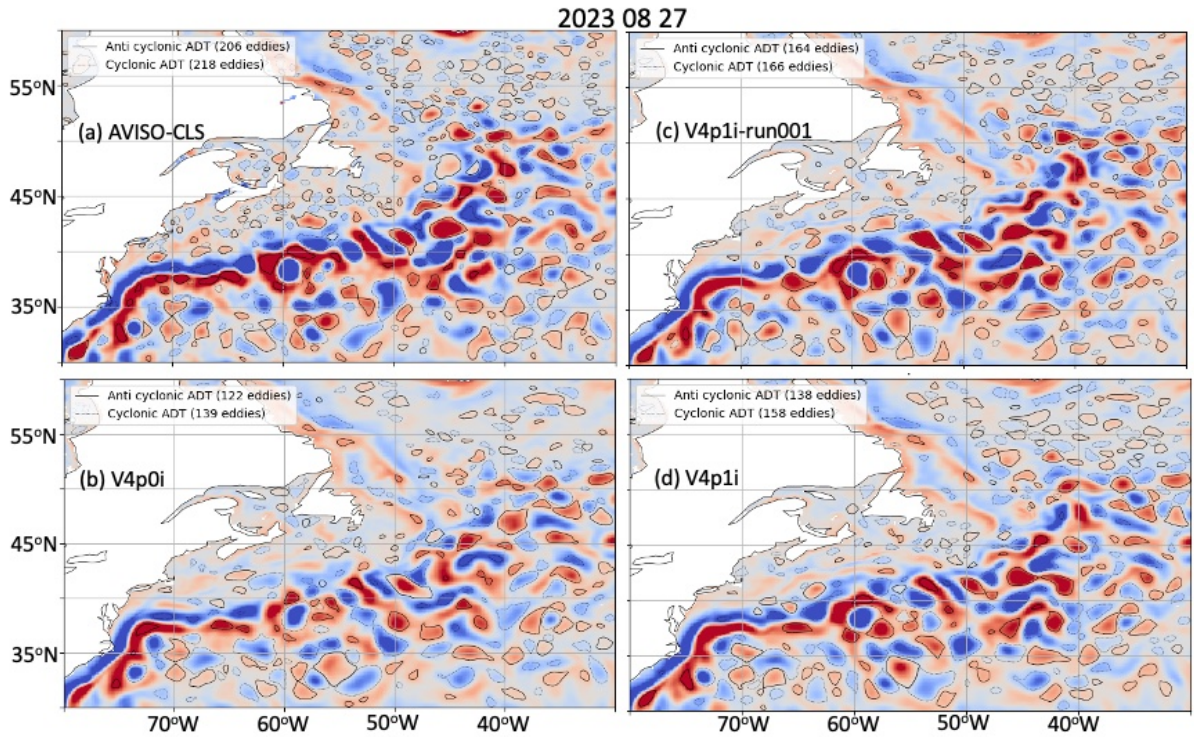

116  
 117 **Figure S 2: Filtered SSH field valid for 27 August 2023 for (a) AVISO gridded satellite observations, 24-hour forecast**  
 118 **fields from (b) v4p0i, (c) v4p1i-run001 and (d) v4p1i.**

119

120

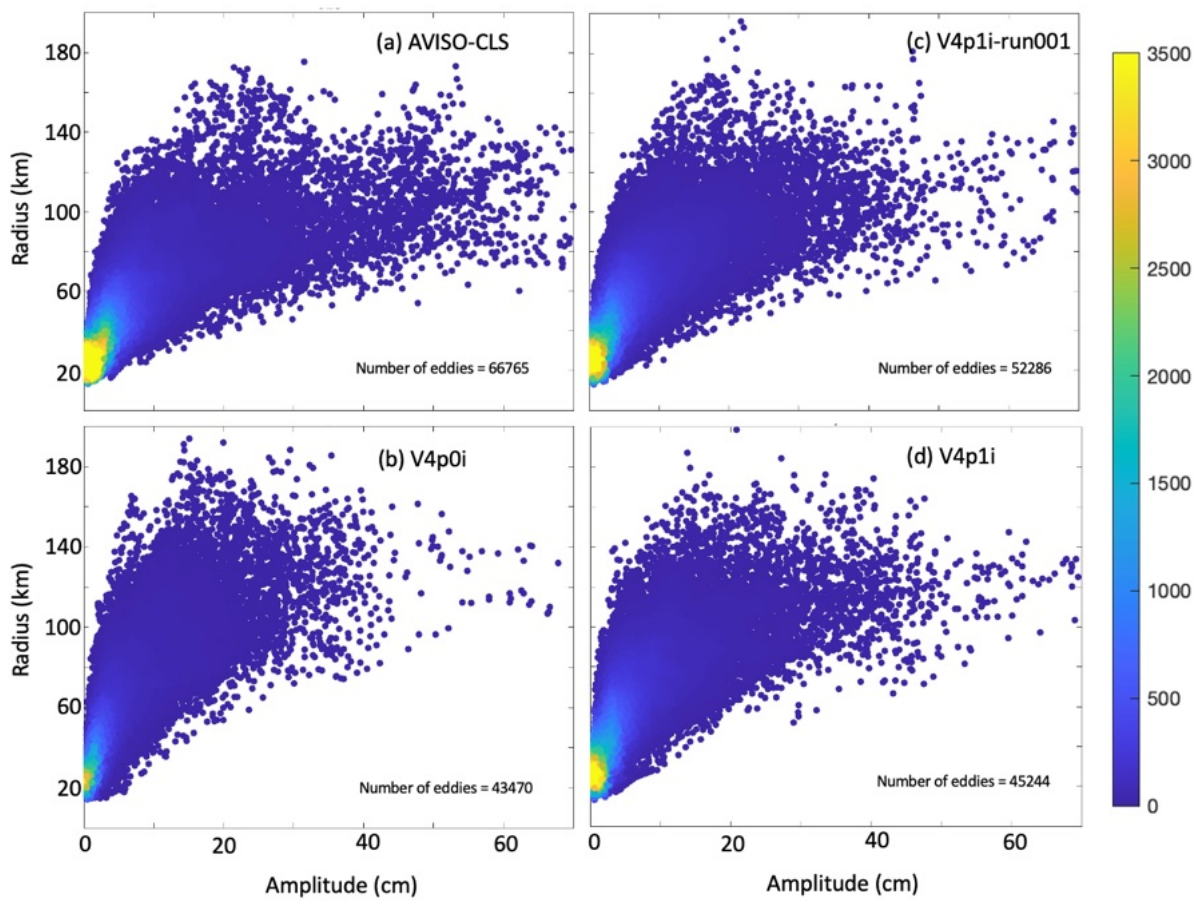

121

122

123

Figure S 3: Density scatter plot showing characteristics of eddies identified over 20 August 2023 to 31 January 2024 for (a) AVISO, (b) V4p0i, (c) V4p1i-run001, and (d) V4p1i.

124

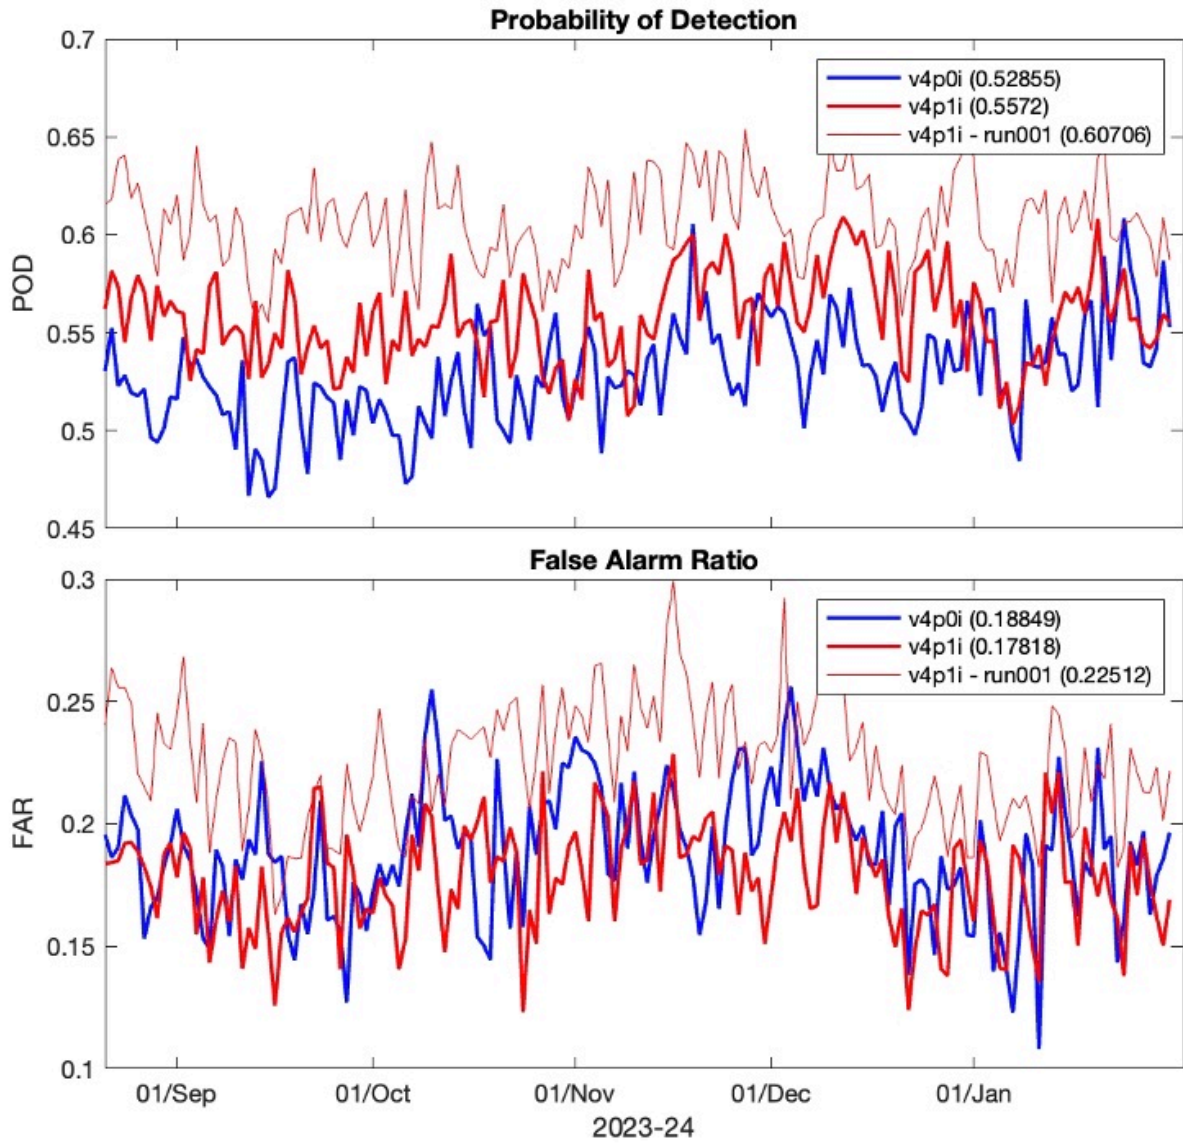

125  
 126 **Figure S 4: Time series of matching statistics for v4p0i (blue), v4p1i (red) and v4p1i-run001 (Blue thin line) over the**  
 127 **period 20 August 2023 to 31 January 2024. The upper panel shows the probability of detection (POD), and the false-**  
 128 **alarm ratio (FAR) is shown in the lower panel.**

129  
 130  
 131  
 132

133 **2 Neighbourhood verification- Continuous Ranked Probability Score (CRPS)**

134  
 135 Neighbourhood verification can account for the double-penalty effect (due to slight spatial and temporal errors in  
 136 high-resolution datasets) by regridding forecasts from different resolutions into a common grid. Neighbourhood  
 137 verification has been applied to SST forecasts using HiRA spatial methods (Crocker et al., 2020; Mittermaier,  
 138 2014), in which forecast grid points within neighbourhoods centred on an observing location are treated as pseudo-  
 139 ensemble members. An assumption is made that the observation is not only valid at the measurement location but

140 also representative of the surrounding area (Barbosa et al., 2024). Here, we use CRPS in a similar but different  
 141 way. In our case, we test the hypothesis that the ensemble average (run004 forecast) has lost spectral power (i.e.,  
 142 is smoother) and benefits from a reduction in the double penalty, even though it is at the exact grid resolution. If  
 143 this is true, we expect the reduction in error for run001 (single-member forecast) to be substantially greater than  
 144 that for the ensemble average restart (run004) forecasts. Furthermore, we expect the error curves to converge.

145

146

147 Leadtime - continuous ranked probability score (CRPS) is used in Fig. S5 and Fig. S6 for average forecasts and  
 148 single-member forecasts from OceanMAPSv4.0i and OceanMAPSv4.1i. NB1 represents 3 x 3 nearest forecast  
 149 points in a square around the observation, whereas NB2 represents 5 x 5 forecast points. Results suggest that there  
 150 is negligible information lost in the average forecast relative to the single-member forecast in both  
 151 OceanMAPSv4.0i and OceanMAPSv4.1i. CRPS results are consistent with the MAE results shown in the paper.

152

153

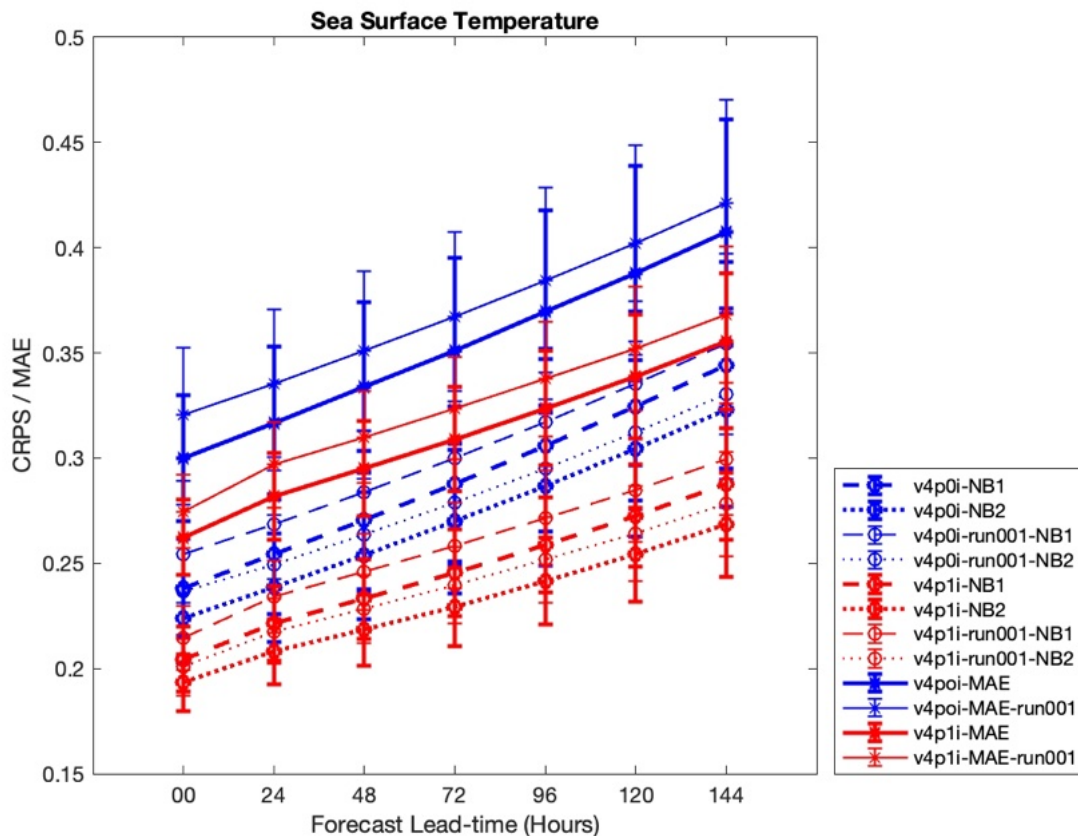

154

155 **Figure S 5: Leadtime SST CRPS, using drifter observations for forecast products from OceanMAPSv4p1i and**  
 156 **OceanMAPSv4p0i using grids NB1 and NB2. Overlaid by single-point forecast MAE.**

157

158

159

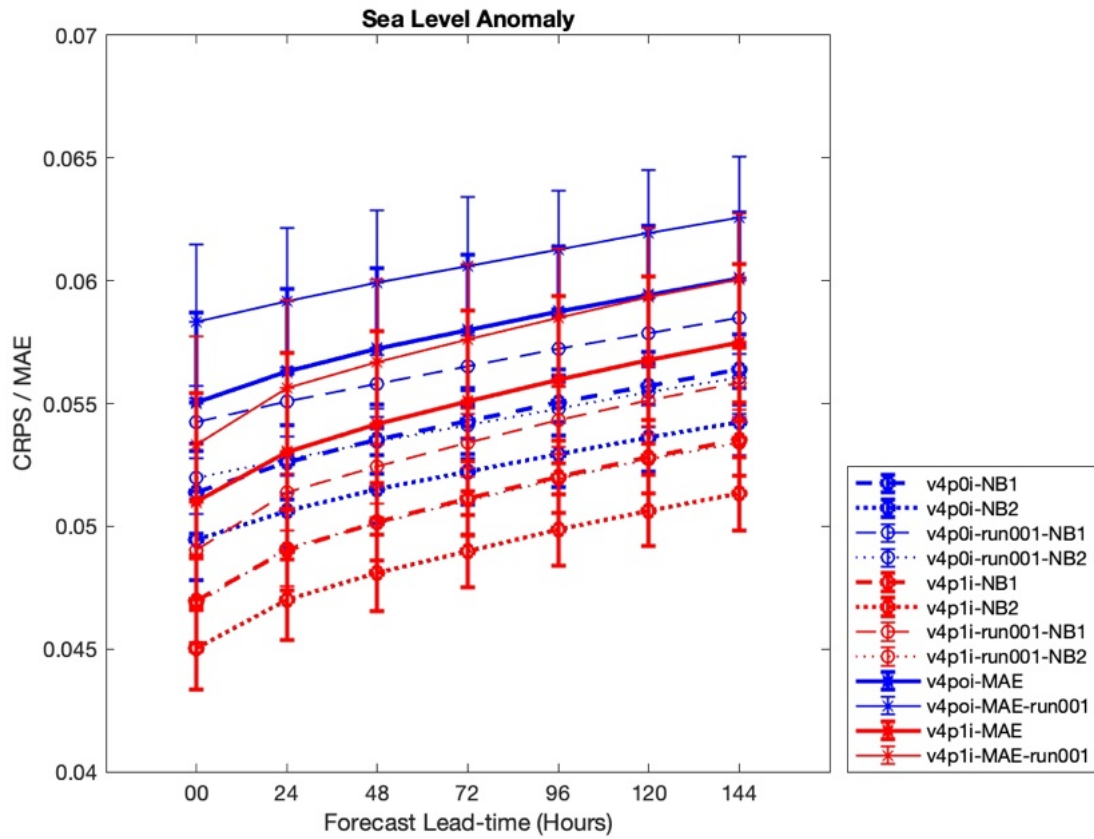

160  
 161  
 162  
 163  
 164  
 165  
 166

**Figure S 6: Leadtime SLA CRPS, using Jason3 observations for forecast products from OceanMAPSv4p1i and OceanMAPSv4p0i using grids NB1 and NB2. This is overlaid by single-point forecast MAE as shown in Figure 11.**

167 **Reference**

168  
 169  
 170  
 171  
 172  
 173  
 174  
 175  
 176  
 177  
 178  
 179

AVISO.: SSALTO/Duacs user handbook: (M)SLA and (M)ADT near-real time and delayed time products, CLS-DOS-NT-06-034, Issue 5rev0, Mesoscale eddy trajectory atlas product handbook, SALP-MU-P-EA-23126-CLS, Issue 3rev2, [https://www.aviso.altimetry.fr/fileadmin/documents/data/tools/hdbk\\_eddytrajectory\\_META2018.pdf](https://www.aviso.altimetry.fr/fileadmin/documents/data/tools/hdbk_eddytrajectory_META2018.pdf), 2016.

Barbosa Aguiar, A., Bell, M.J., Blockley, E., Calvert, D., Crocker, R., Inverarity, G., King, R., Lea, D.J., Maksymczuk, J., Martin, M.J. and Price, M.R.: The Met Office Forecast Ocean Assimilation Model (FOAM) using a 1/12-degree grid for global forecasts., Quarterly Journal of the Royal Meteorological Society, 150(763), 3827-3852, 2024.

180 Crocker, R., Maksymczuk, J., Mittermaier, M., Tonani, M., and Pequignet, C.: An approach to the verification  
181 of high-resolution ocean models using spatial methods, *Ocean Sci.*, 16, 831–845, [https://doi.org/10.5194/os-16-](https://doi.org/10.5194/os-16-831-2020)  
182 [831-2020](https://doi.org/10.5194/os-16-831-2020), 2020.

183

184 Mason, E., Pascual, A., McWilliams, J. C.: A new sea surface height-based code for oceanic mesoscale eddy  
185 tracking, *Journal of Atmospheric and Oceanic Technology.*, 31, 1181–1188, [https://doi.org/10.1175/JTECH-D-](https://doi.org/10.1175/JTECH-D-14-00019.1)  
186 [14-00019.1](https://doi.org/10.1175/JTECH-D-14-00019.1), 2014.

187

188 Mittermaier, M. P.: A Strategy for Verifying Near-Convection-Resolving Model Forecasts at Observing Sites,  
189 *Weather Forecast.*, 29, 185- 204, <https://doi.org/10.1175/WAF-D-12-00075.1>, 2014.

190

191 Smith, G. C. and Fortin, A.S.: Verification of eddy properties in operational oceanographic analysis systems,  
192 *Ocean Modelling.*, 172, 101982, 2022.

193
